# Supplementary material
Source: Research Square preprint supplement (doi:10.21203/rs.3.rs-8811837/v1)
Supplement: Supplementary file 1 [file e9ced452160542eb8a3cddc3.docx]

Supplementary Information for

Thermally controllable diffractive processor using hybrid metasurfaces

Guannan Wang1,#, Xiaofei Zang1,3*，#, Xinyu Huang2,#, Teng Zhang1, Zhiyu Tan1, Zhe Gao1, Jinggui Sun1, Jingbo Wu2*, Biaobing Jin2, Yiming Zhu1,3*, Songlin Zhuang1

Correspondence: Xiaofei Zang (xfzang@usst.edu.cn) or Jingbo Wu (jbwu@nju.edu.cn) or Yiming Zhu (ymzhu@usst.edu.cn)

1Terahertz Technology Innovation Research Institute, and Shanghai Key Lab of Modern Optical System, University of Shanghai for Science and Technology, No. 516 JunGong Road, Shanghai 200093, China

2Research Institute of Superconductor Electronics & Key Laboratory of Optoelectronic Devices and Systems with Extreme Performances of MOE, School of Electronic Science and Engineering, Nanjing University, Nanjing 210023, China

3Shanghai Institute of Intelligent Science and Technology, Tongji University, Shanghai 200092, China

#These authors contributed equally: Guannan Wang, Xiaofei Zang, Xinyu Huang

This file includes:

Supplementary Note 1: Fabricated gold masks as the input of the TDP for experimental validation

Supplementary Note 2: The forward propagation module and neural networks training of the TDP

Supplementary Note 3: Robustness validation of the TDP for the single object classification task

Supplementary Note 4: The TDP for classifying 10-class fashion products and 10-class handwritten digits

Supplementary Note 5: The TDP for the function switching between classification and imaging

Supplementary Note 6: Robustness validation of the TDP for the double object classification task

Supplementary Note 7: The adaptability of the TDP-based decoder to different appearances of ciphertext

**Section 1: Fabricated gold masks as the input of the TDP for experimental validation.**


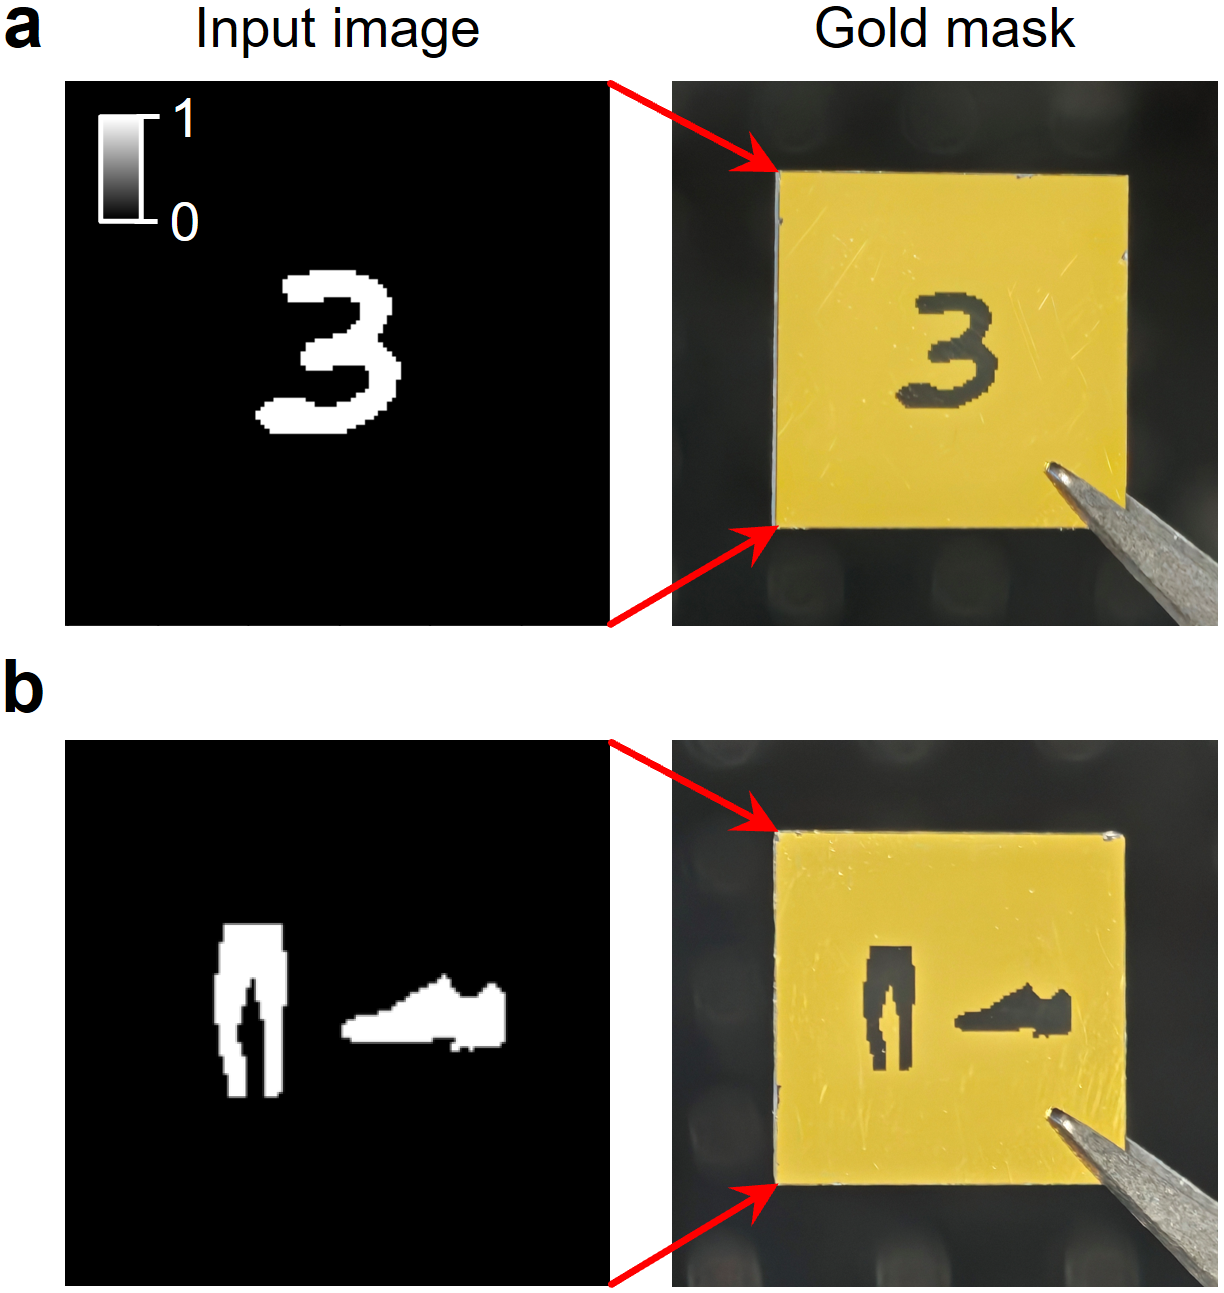


**Fig. S1 Fabricated gold masks. a** Input image and gold mask of handwritten digit “3” in simulation and experiment. **b** Input image and gold mask of double-fashion product “trouser and sneaker” in simulation and experiment.

To experimentally validate the functionality of the TDP, we utilize the gold masks featuring input patterns to generate the neural network inputs. Figure S1a showcases the binarized image of handwritten digit “3” (from MNIST dataset) with fabricated gold mask. Figure S1b presents the binarized image of dual-fashion product “trouser and sneaker” (from Fashion-MNIST dataset) and fabricated samples.

**Section 2: The forward propagation module and neural networks training of the TDP.**

The forward propagation module of the TDP is based on diffractive optics theory. According to the Huygens-Fresnel principle, the wavefront generated by each meta-neurons of the TDP is composed of a plethora of secondary spherical sources. Therefore, these meta-neurons in adjacent hidden layers are fully connected to each other through the light diffraction and propagation. For the and hidden layers and according to Rayleigh-Sommerfeld diffraction theory, the connection between their diffraction filed can be expressed as:

(S1)

where is the phase distribution of metasurfaces. The impulse response can be defined as:

(S2)

where , is the illumination wavelength, and is the imaginary number of . For a TDP consisting of *L* layer (excluding the input and output planes), the output electric-filed intensity of the meta-neuron can be expressed as:

(S3)

To train the TDP, we employ stochastic gradient descent algorithm, Adam, to back-propagate the neural network errors and update the phase distributions of metasurfaces. The mean squared error (MSE) between the output electric field and the corresponding ground truth are used as the loss function:

(S4)

where refers to the number of measurement points at the output plane. During training, for minimizing the loss function, the gradient of with respect to can be represented as:

(S5)

In Eq. (S5), quantifies the gradient of the complex-valued electric field at the output plane. For each layer, , this gradient can be deduced as:

(S6)

(S7)

(S8)

…

(S9)

Where . Based on the calculated gradients for each layer of the TDP, the loss is reduced and the phase distributions are optimized during each training iteration.

**Section 3: Robustness validation of the TDP for the single object classification task.**


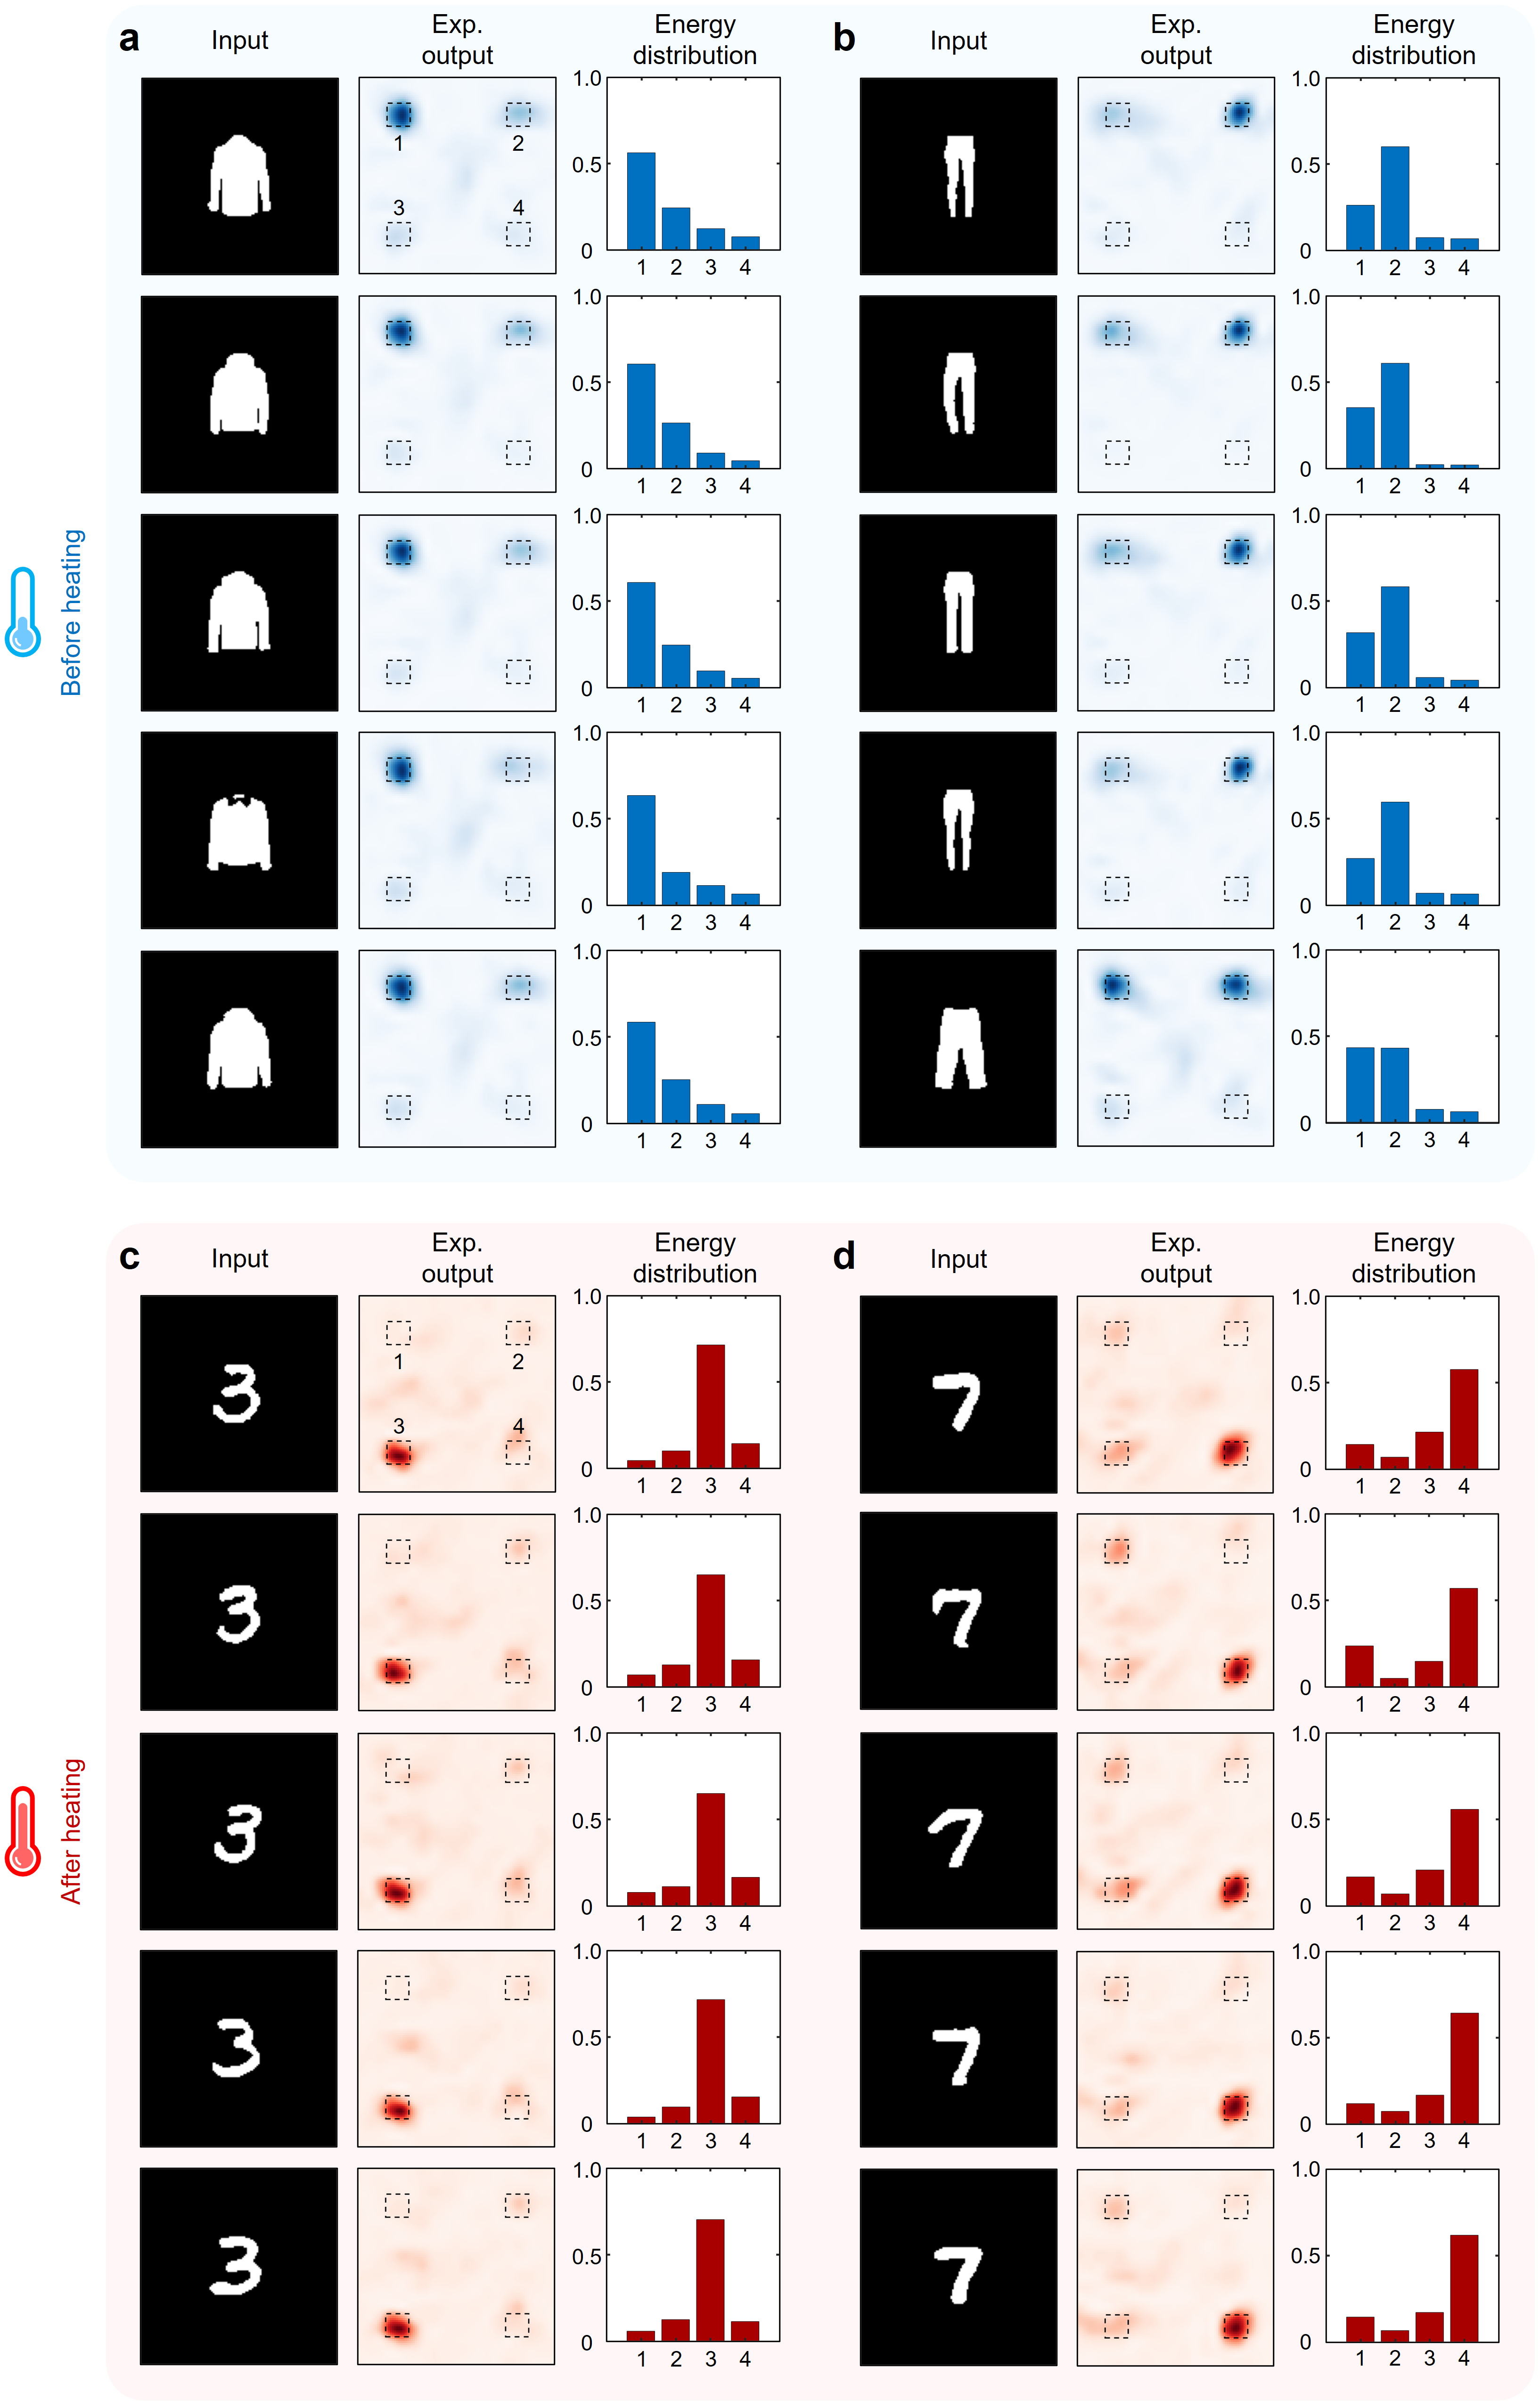


**Fig. S2 Experimental demonstration of the TDP for single object inputs with different appearances. a, b** Before heating, under the illumination of *x*-polarized waves at 0.5 THz, the measured output electric field intensity distributions and corresponding energy distributions of the TDP with five coats and five trousers as inputs. **c, d** After heating, under the illumination of *x*-polarized waves at 0.5 THz, the measured results of the TDP for the inputs of five handwritten digits 3 and five handwritten digits 7.

To demonstrate the classification robustness of the TDP, we experimentally select a batch of fashion products and handwritten digits from the testing dataset with the same category as shown in the Fig. 3 of the main text but have different appearances. As shown in Fig. S2a for the room temperature, five coats with different appearances are selected as the inputs. The output electric field intensity distributions are mainly focused at the top left corner in the output plane and the corresponding energy distributions present the classification results. Figure S2b shows the recognition of five trousers with different appearances. After heating, the TDP switches the classification target to handwritten digits. Figures S2c, d illustrate the recognition results for the inputs of five different appearances of the handwritten digits 3 and 7, respectively.

**Section 4: The TDP for classifying 10-class fashion products and 10-class handwritten digits.**


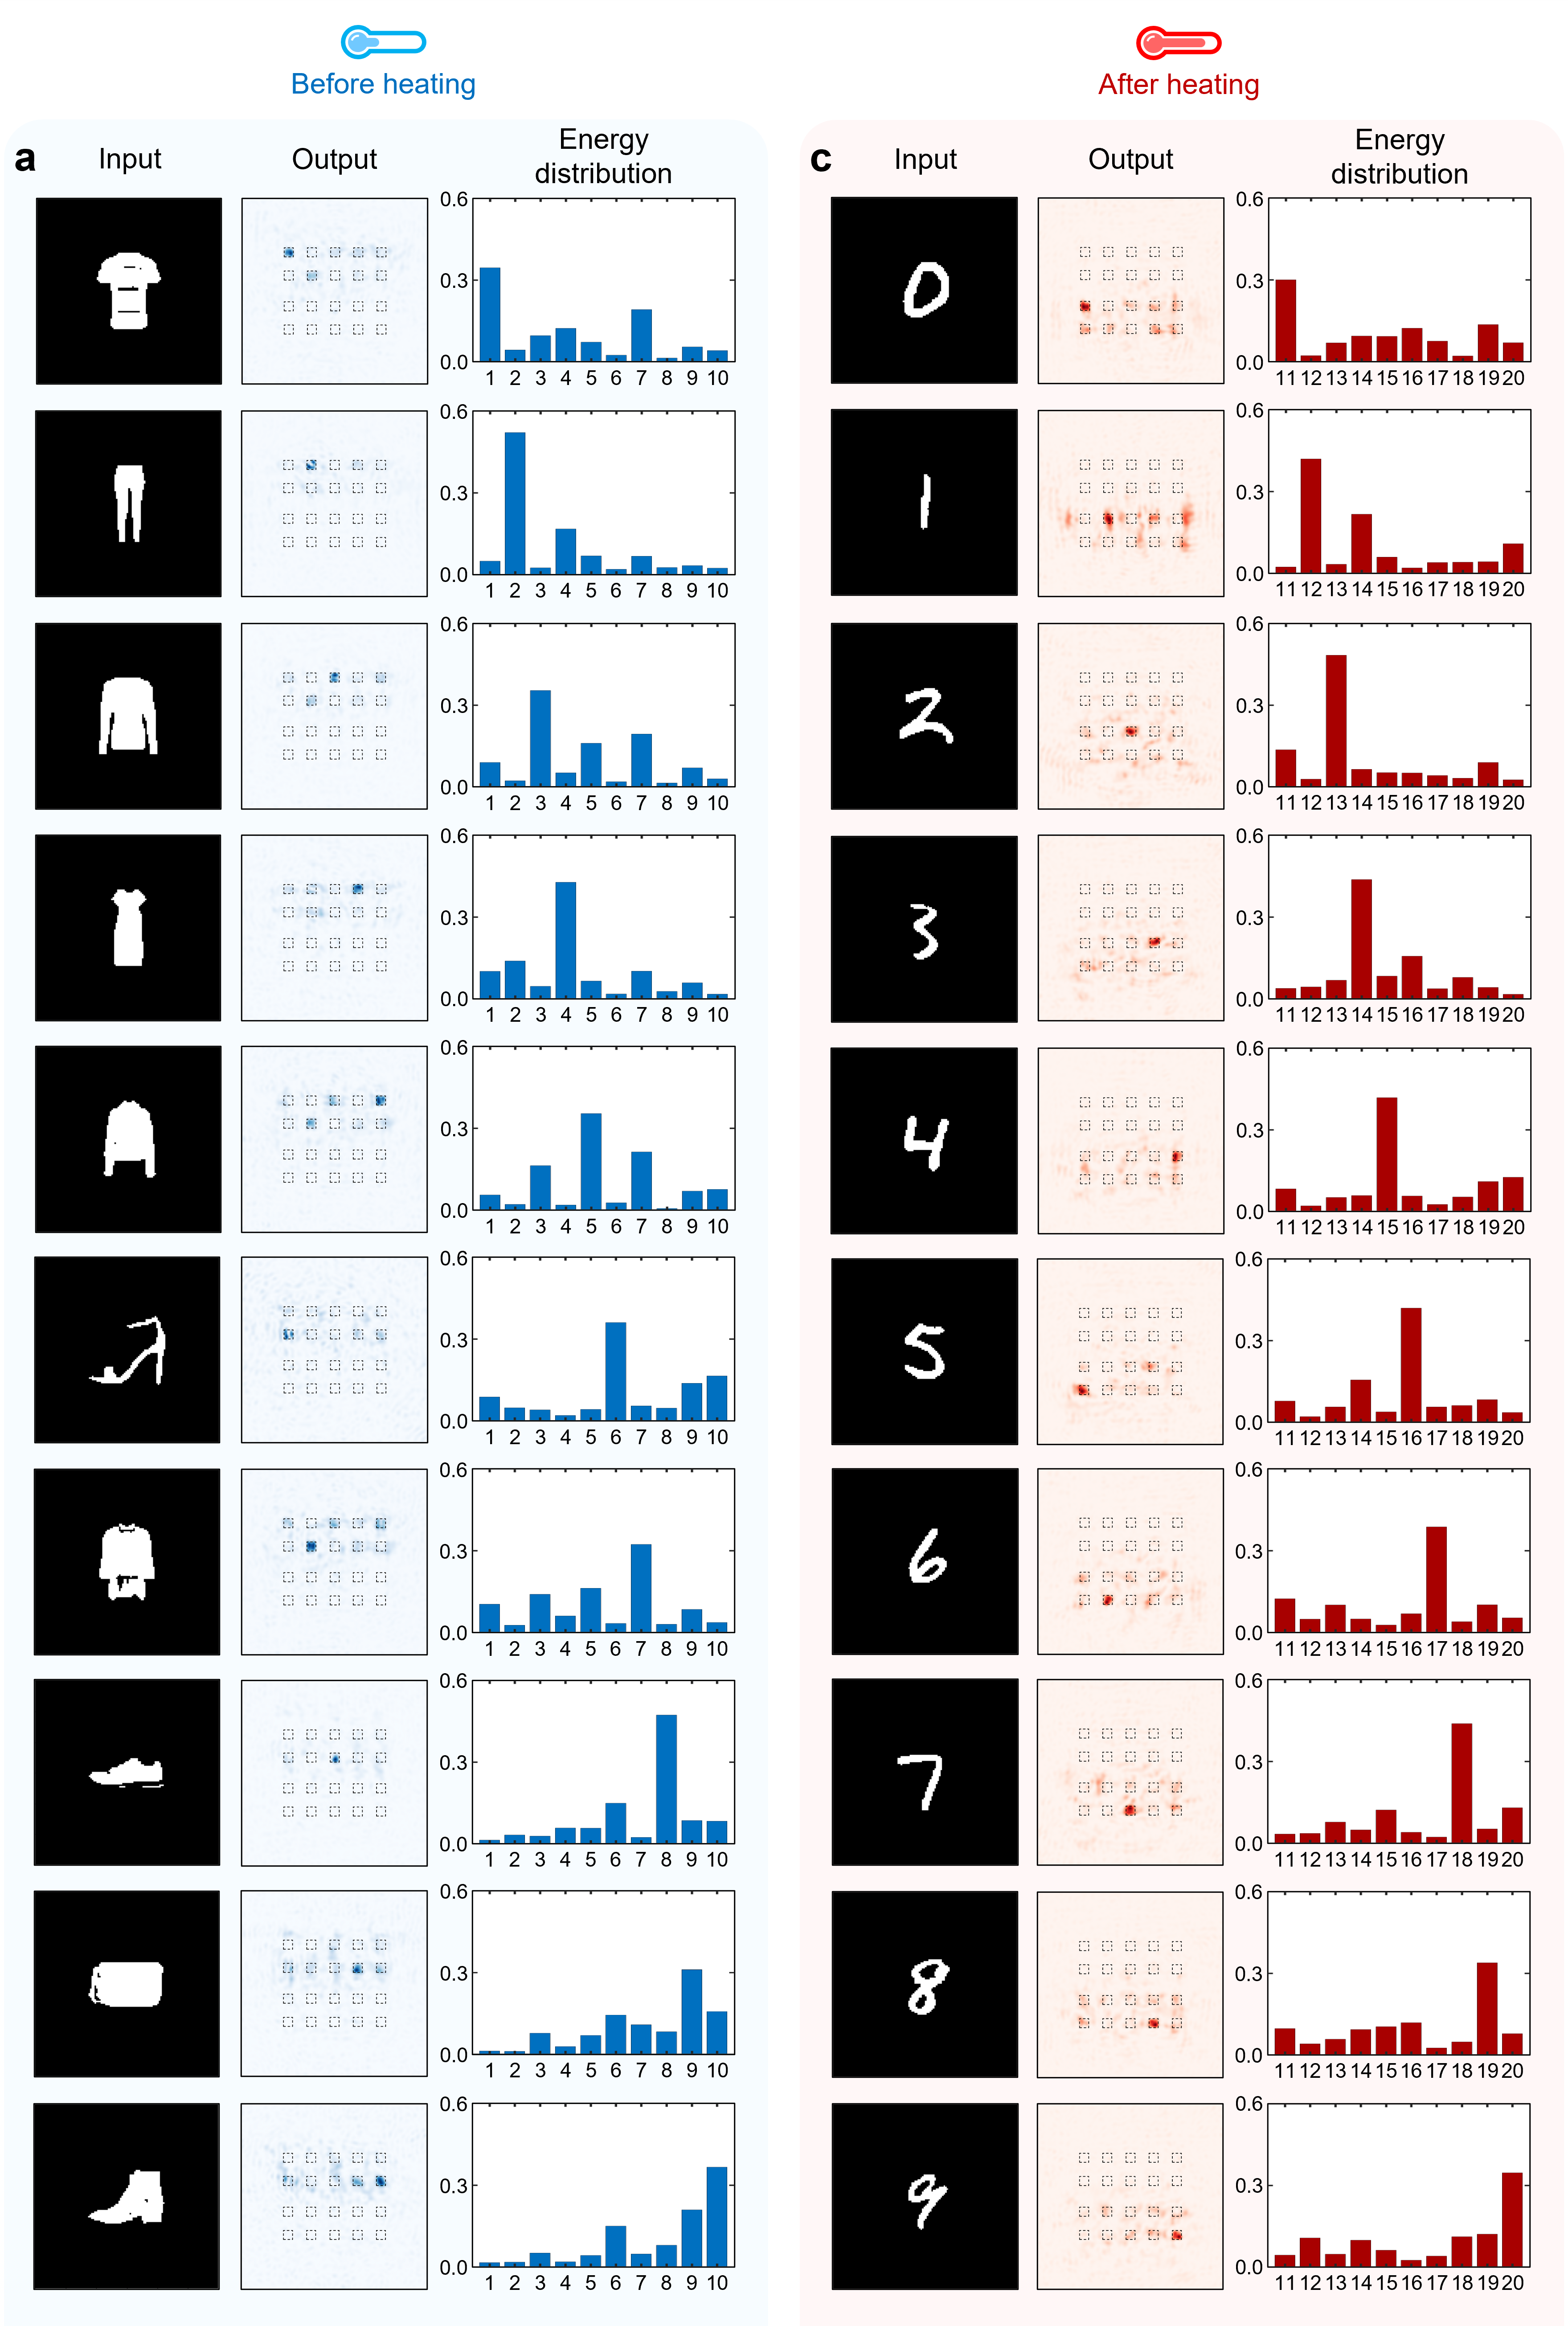

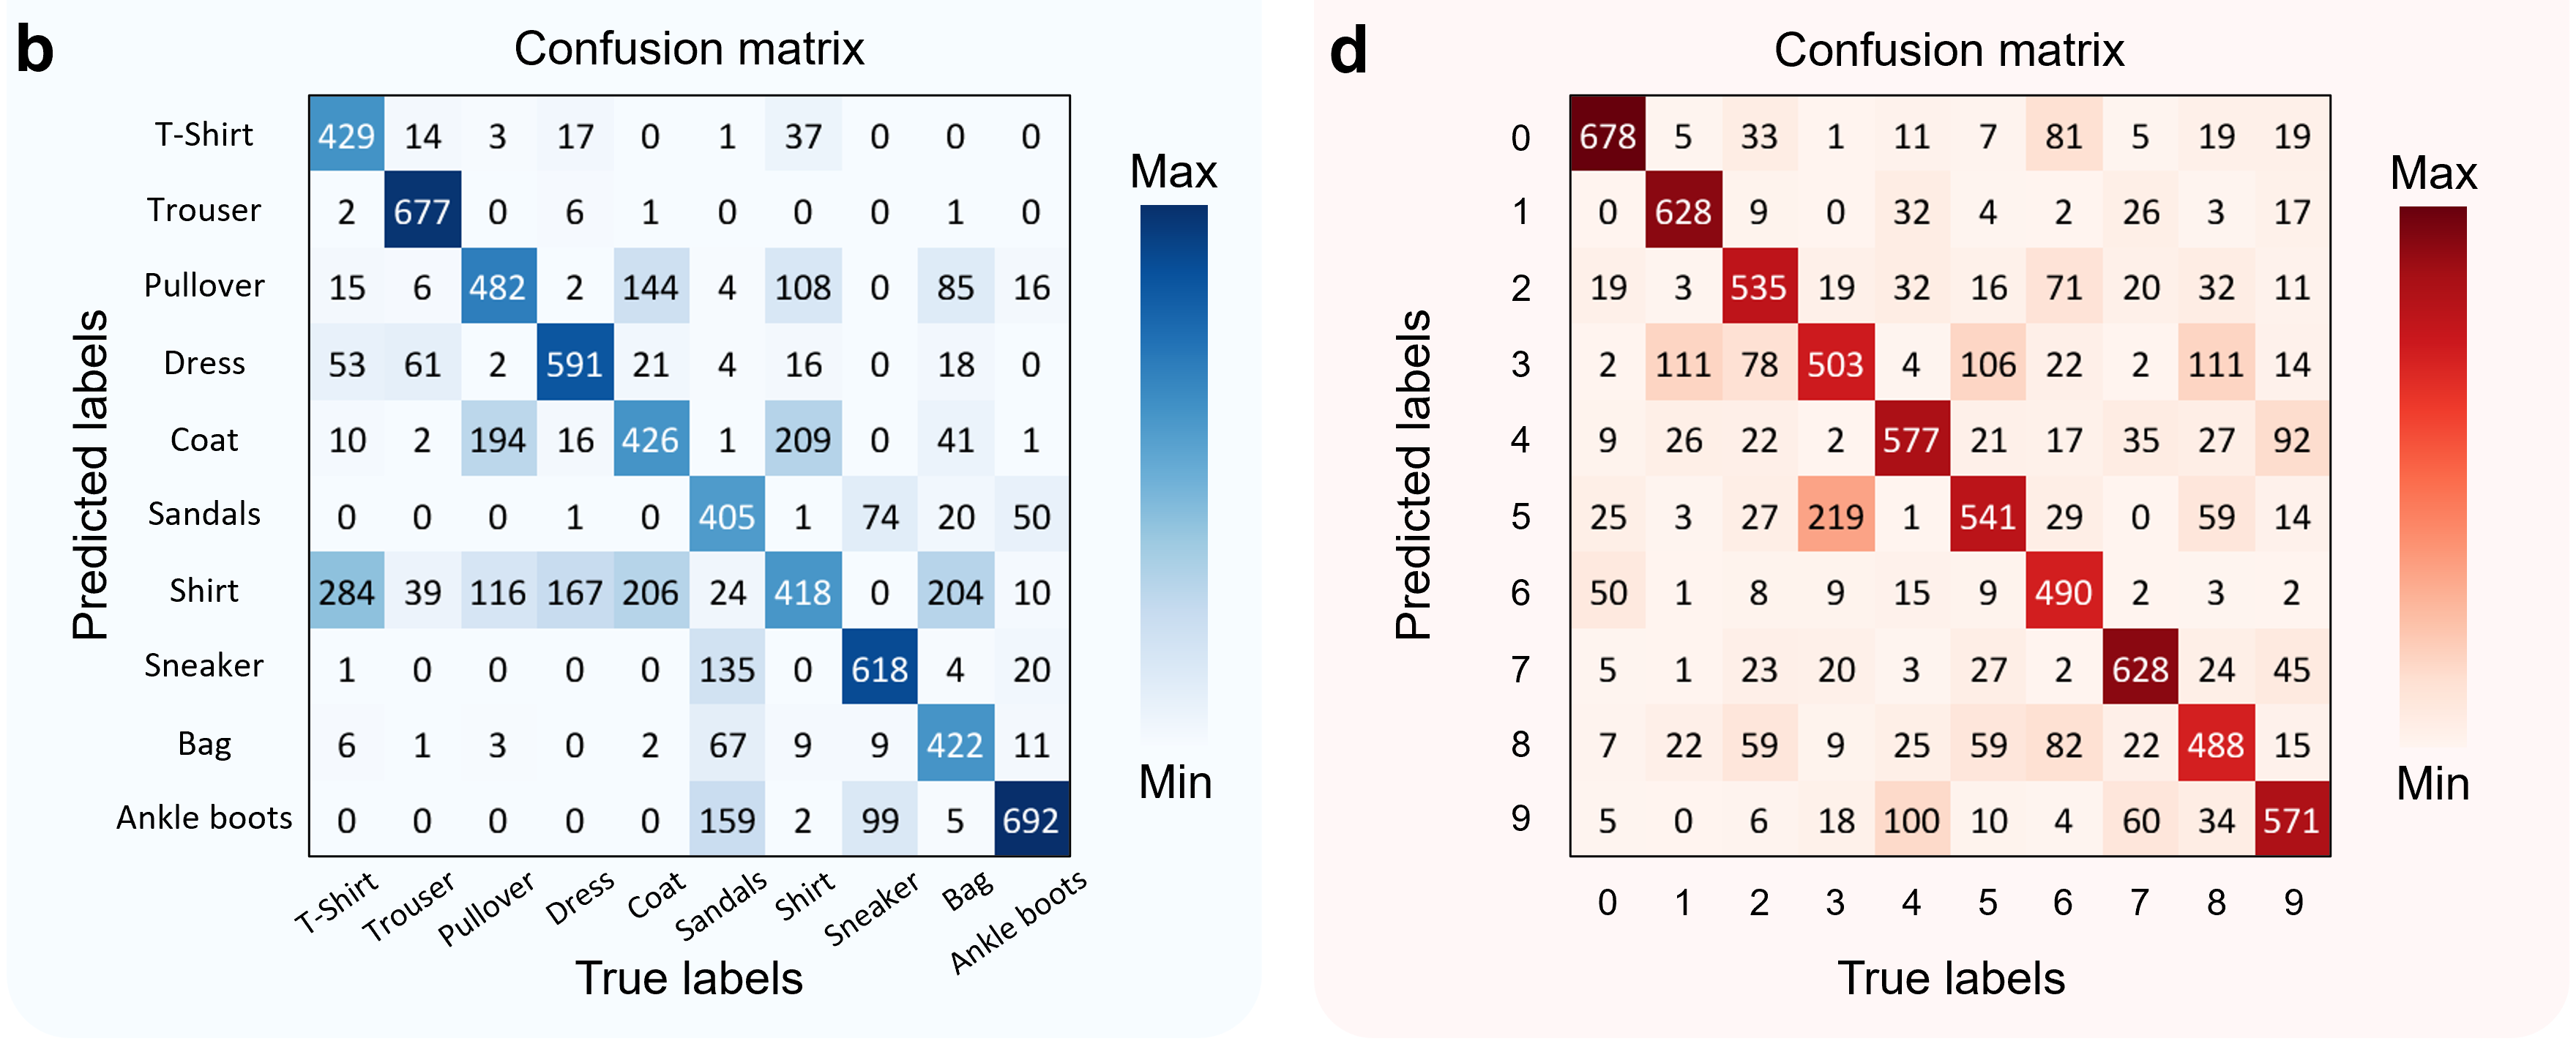


**Fig. S3 Calculated results of the TDP for recognizing 10-class fashion products and 10-class handwritten digits. a** Before heating, the output electric field intensity distributions and energy distributions of the TDP for 10-class fashion product inputs. **b** Calculated confusion matrix for the classification of fashion products. **c** After heating, the output electric field intensity distributions and energy distributions of the TDP for 10-class handwritten digit inputs. **d** Calculated confusion matrix for the classification of handwritten digits.

We further train a TDP for the task of recognizing all 10-class fashion products (from Fashion-MNIST dataset) and all 10-class handwritten digits (from MNIST dataset) by switching the temperature conditions, as shown in Fig. S3. In the output plane, 20 discrete regions are predesigned for electric field detection and classification, with the top two rows allocated to room temperature condition and the bottom two rows to elevated temperature condition. At room temperature, the TDP works as a fashion product classifier. As illustrated in Fig. S3a, under the illumination of *x*-polarization waves at 0.5 THz, 10 fashion products (“T-Shirt”, “Trouser”, “Pullover”, “Dress”, “Coat”, “Sandals”, “Shirt”, “Sneaker”, “Bag”, and “Ankle boots”) are selected as the input of the TDP. The output electric field intensity distributions, modulated by the TDP, are mainly focused at the top two rows in the output plane, and the calculated normalized energy distributions confirm the successful classification. Figure S3b further characterizes classification performance by calculating the confusion matrix for 10-class fashion products, achieving a classification accuracy of 64.5%. After heating, the TDP functions as a handwritten digit classifier. As depicted in Fig. S3c, 10 digits (“0” to “9”) serve as the input under the illumination of *x*-polarized waves at 0.5 THz. The output electric field intensity distributions are concentrated at the bottom two rows, and the corresponding energy distributions demonstrate the recognition of handwritten digits. Figure S3d presents the calculated confusion matrix for 10-class handwritten digits, showing an accuracy of 70.5%.

**Section 5: The TDP for the function switching between classification and imaging.**


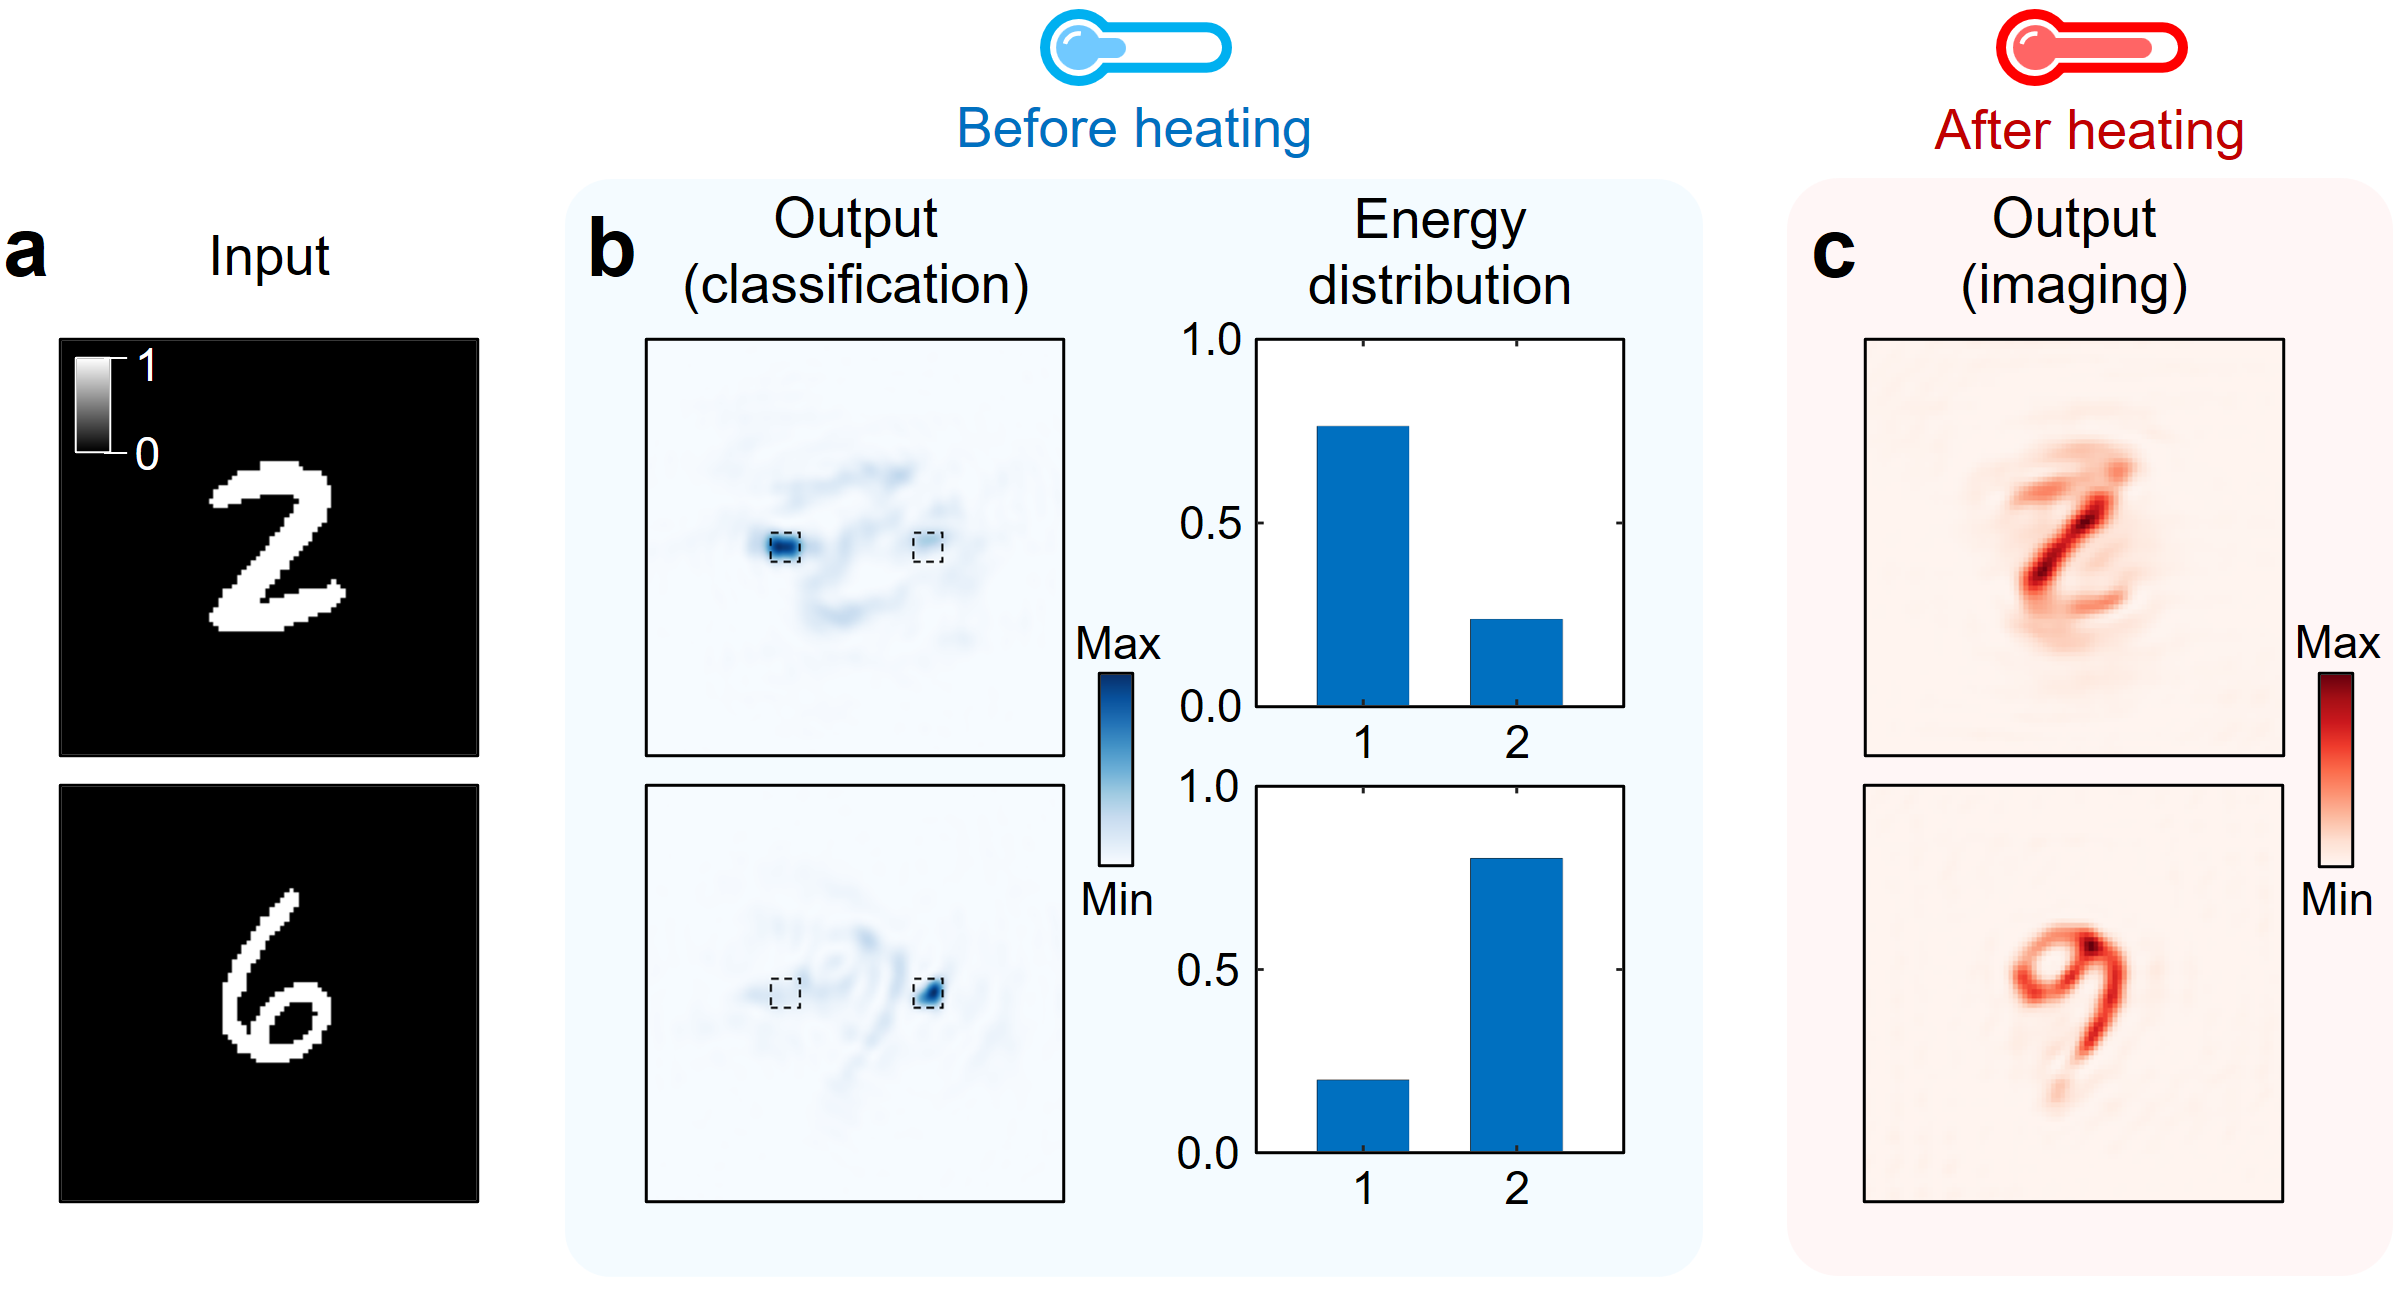


**Fig. S4** **Simulated results of the TDP for the function switching between classification and imaging. a** Handwritten digits 2 and 6 as the TDP input. **b** Before heating, the output electric field intensity distributions and corresponding energy distributions of the TDP. **c** After heating, the output electric field intensity distributions of the TDP.

The proposed TDP can be trained to enable versatile function switching under the two temperature conditions, such as the recognition function at room temperature and the imaging function at the elevated temperature. As shown in Fig. S4b for the room temperature, the TDP processes the classification of handwritten digits 2 and 6. Under the illumination of *x*-polarized waves at 0.5 THz, two handwritten digits (Fig. S4a) from MNIST testing dataset are selected as the input, and the TDP focuses the electric field at two discrete detection regions in the output plane. The calculated energy distributions of these two regions present the correct classification results for the handwritten digits. After heating, the TDP is switched to an imager, as illustrated in Fig. S4c. With the same content input as under room temperature, the TDP reproduces the input images (inverted) in the output plane, which demonstrates the imaging capability.

**Section 6: Robustness validation of the TDP for the double object classification task.**


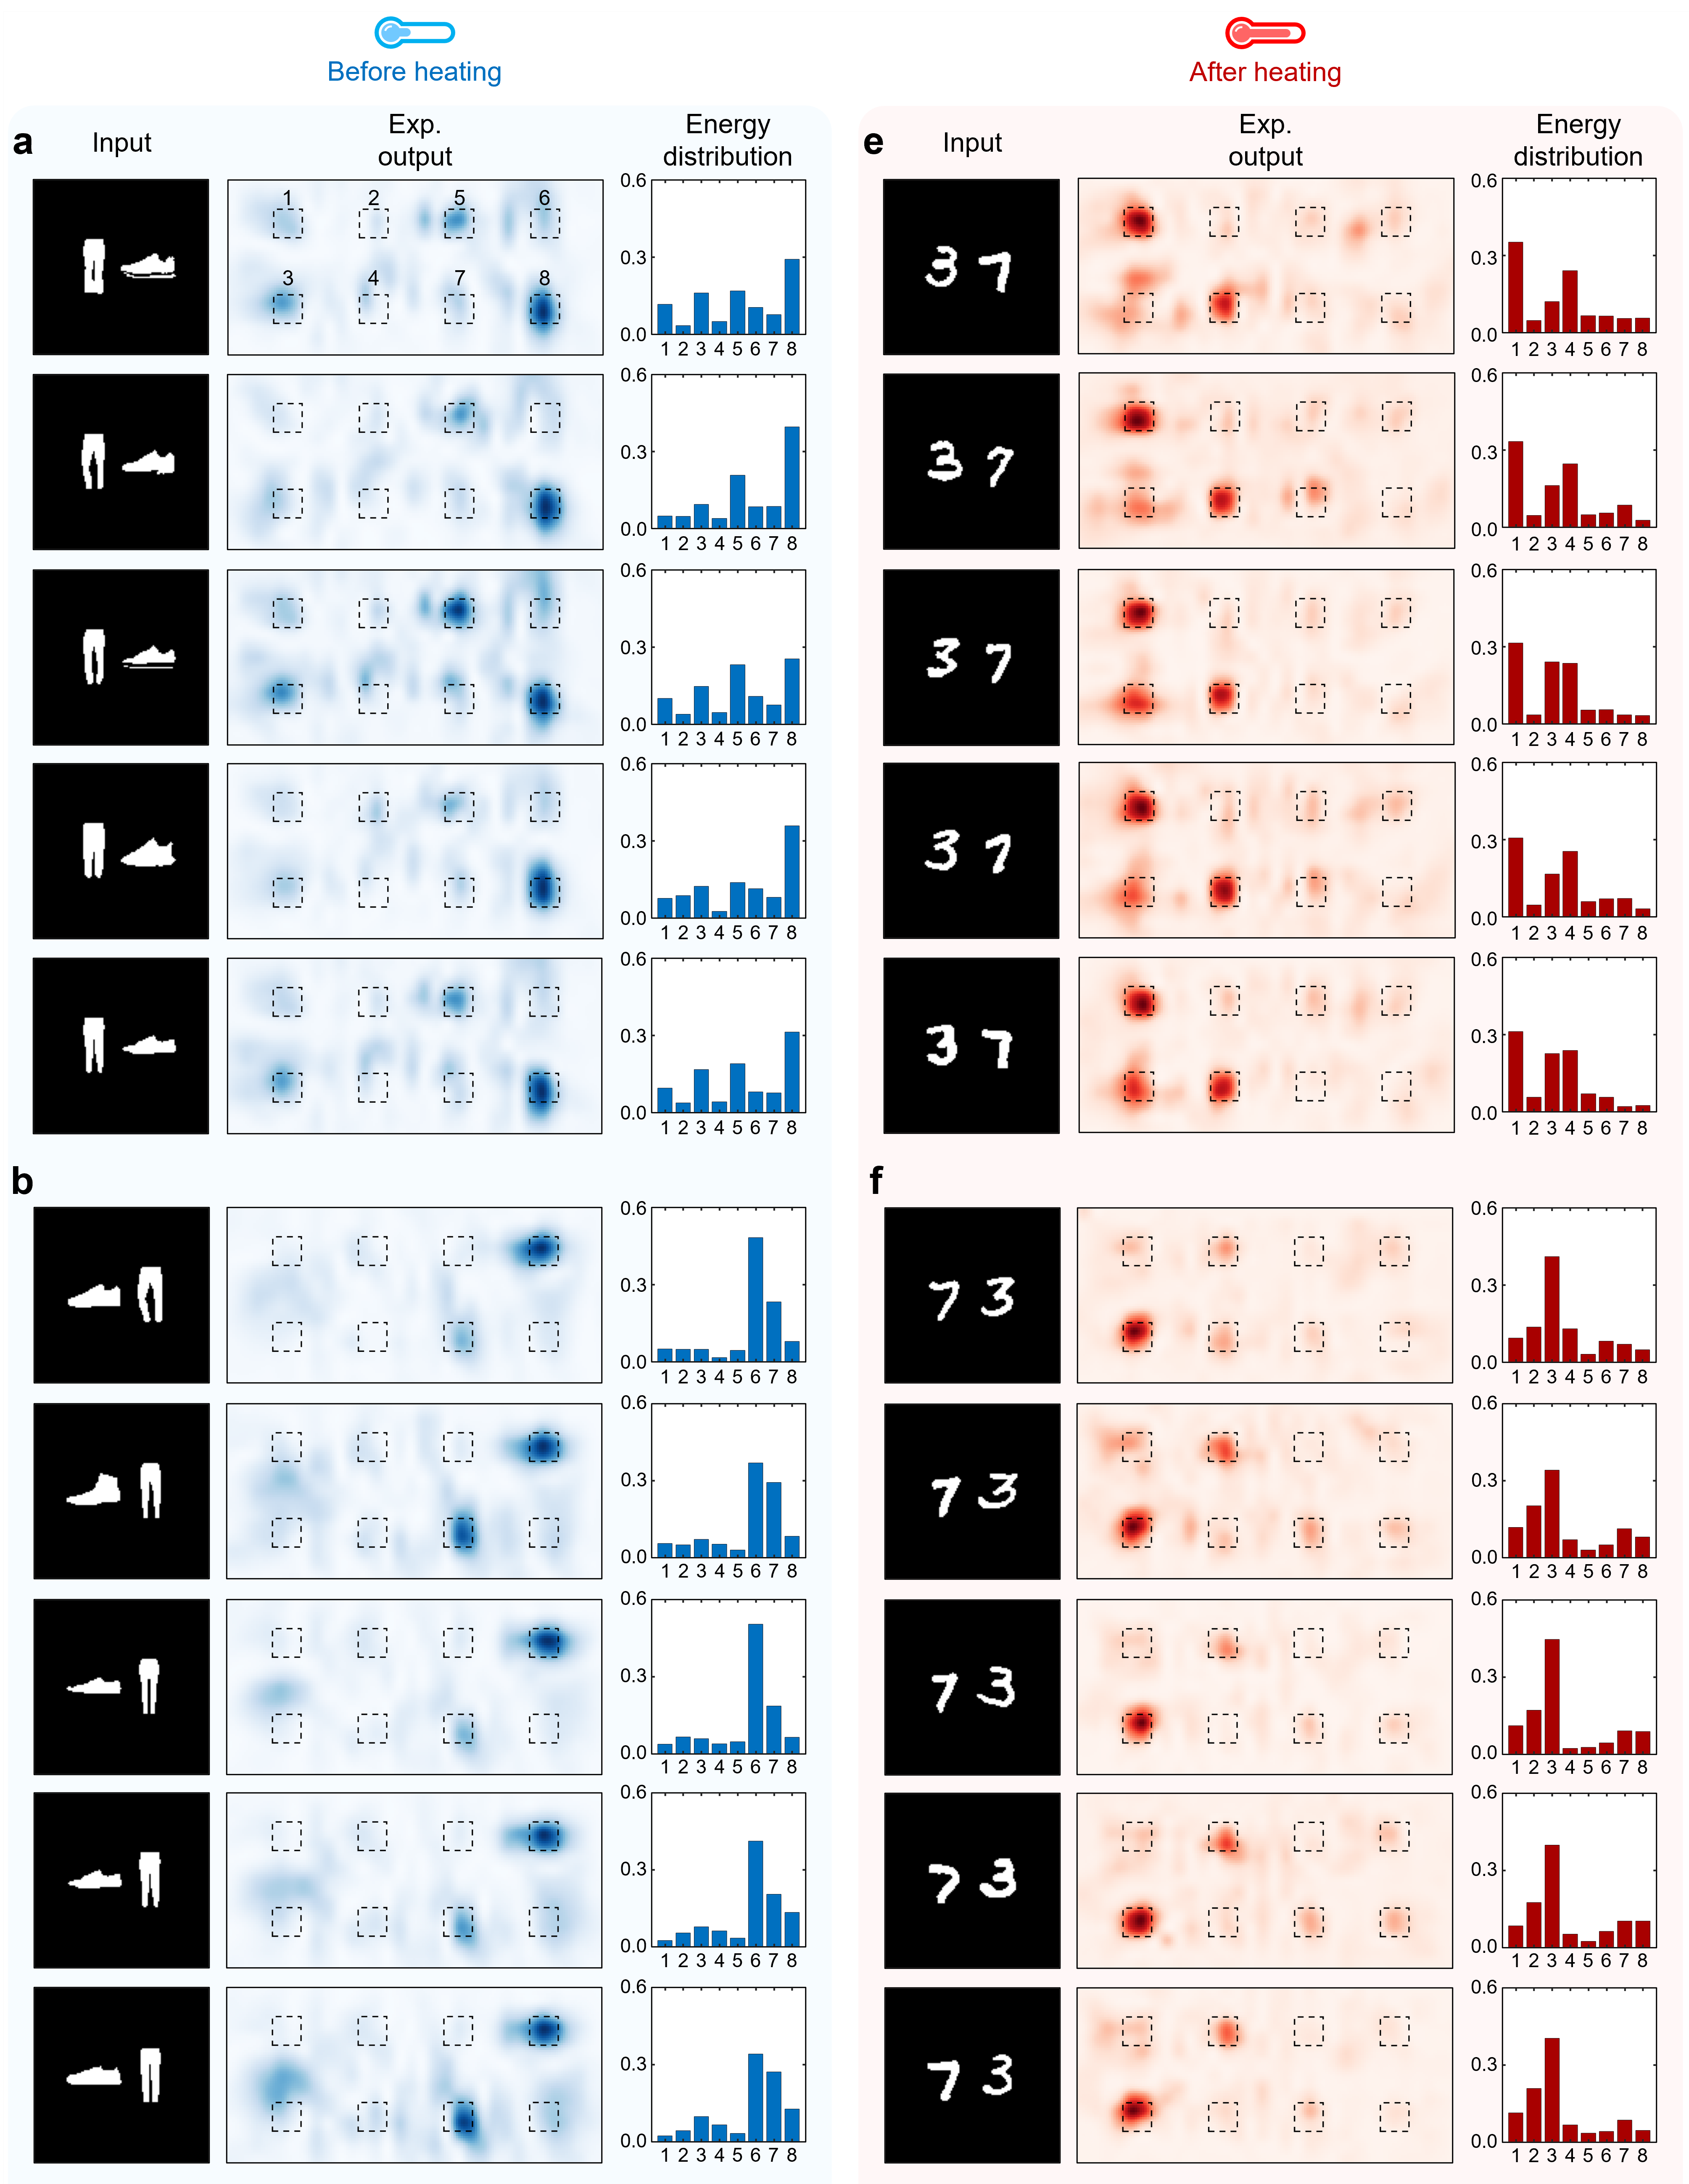

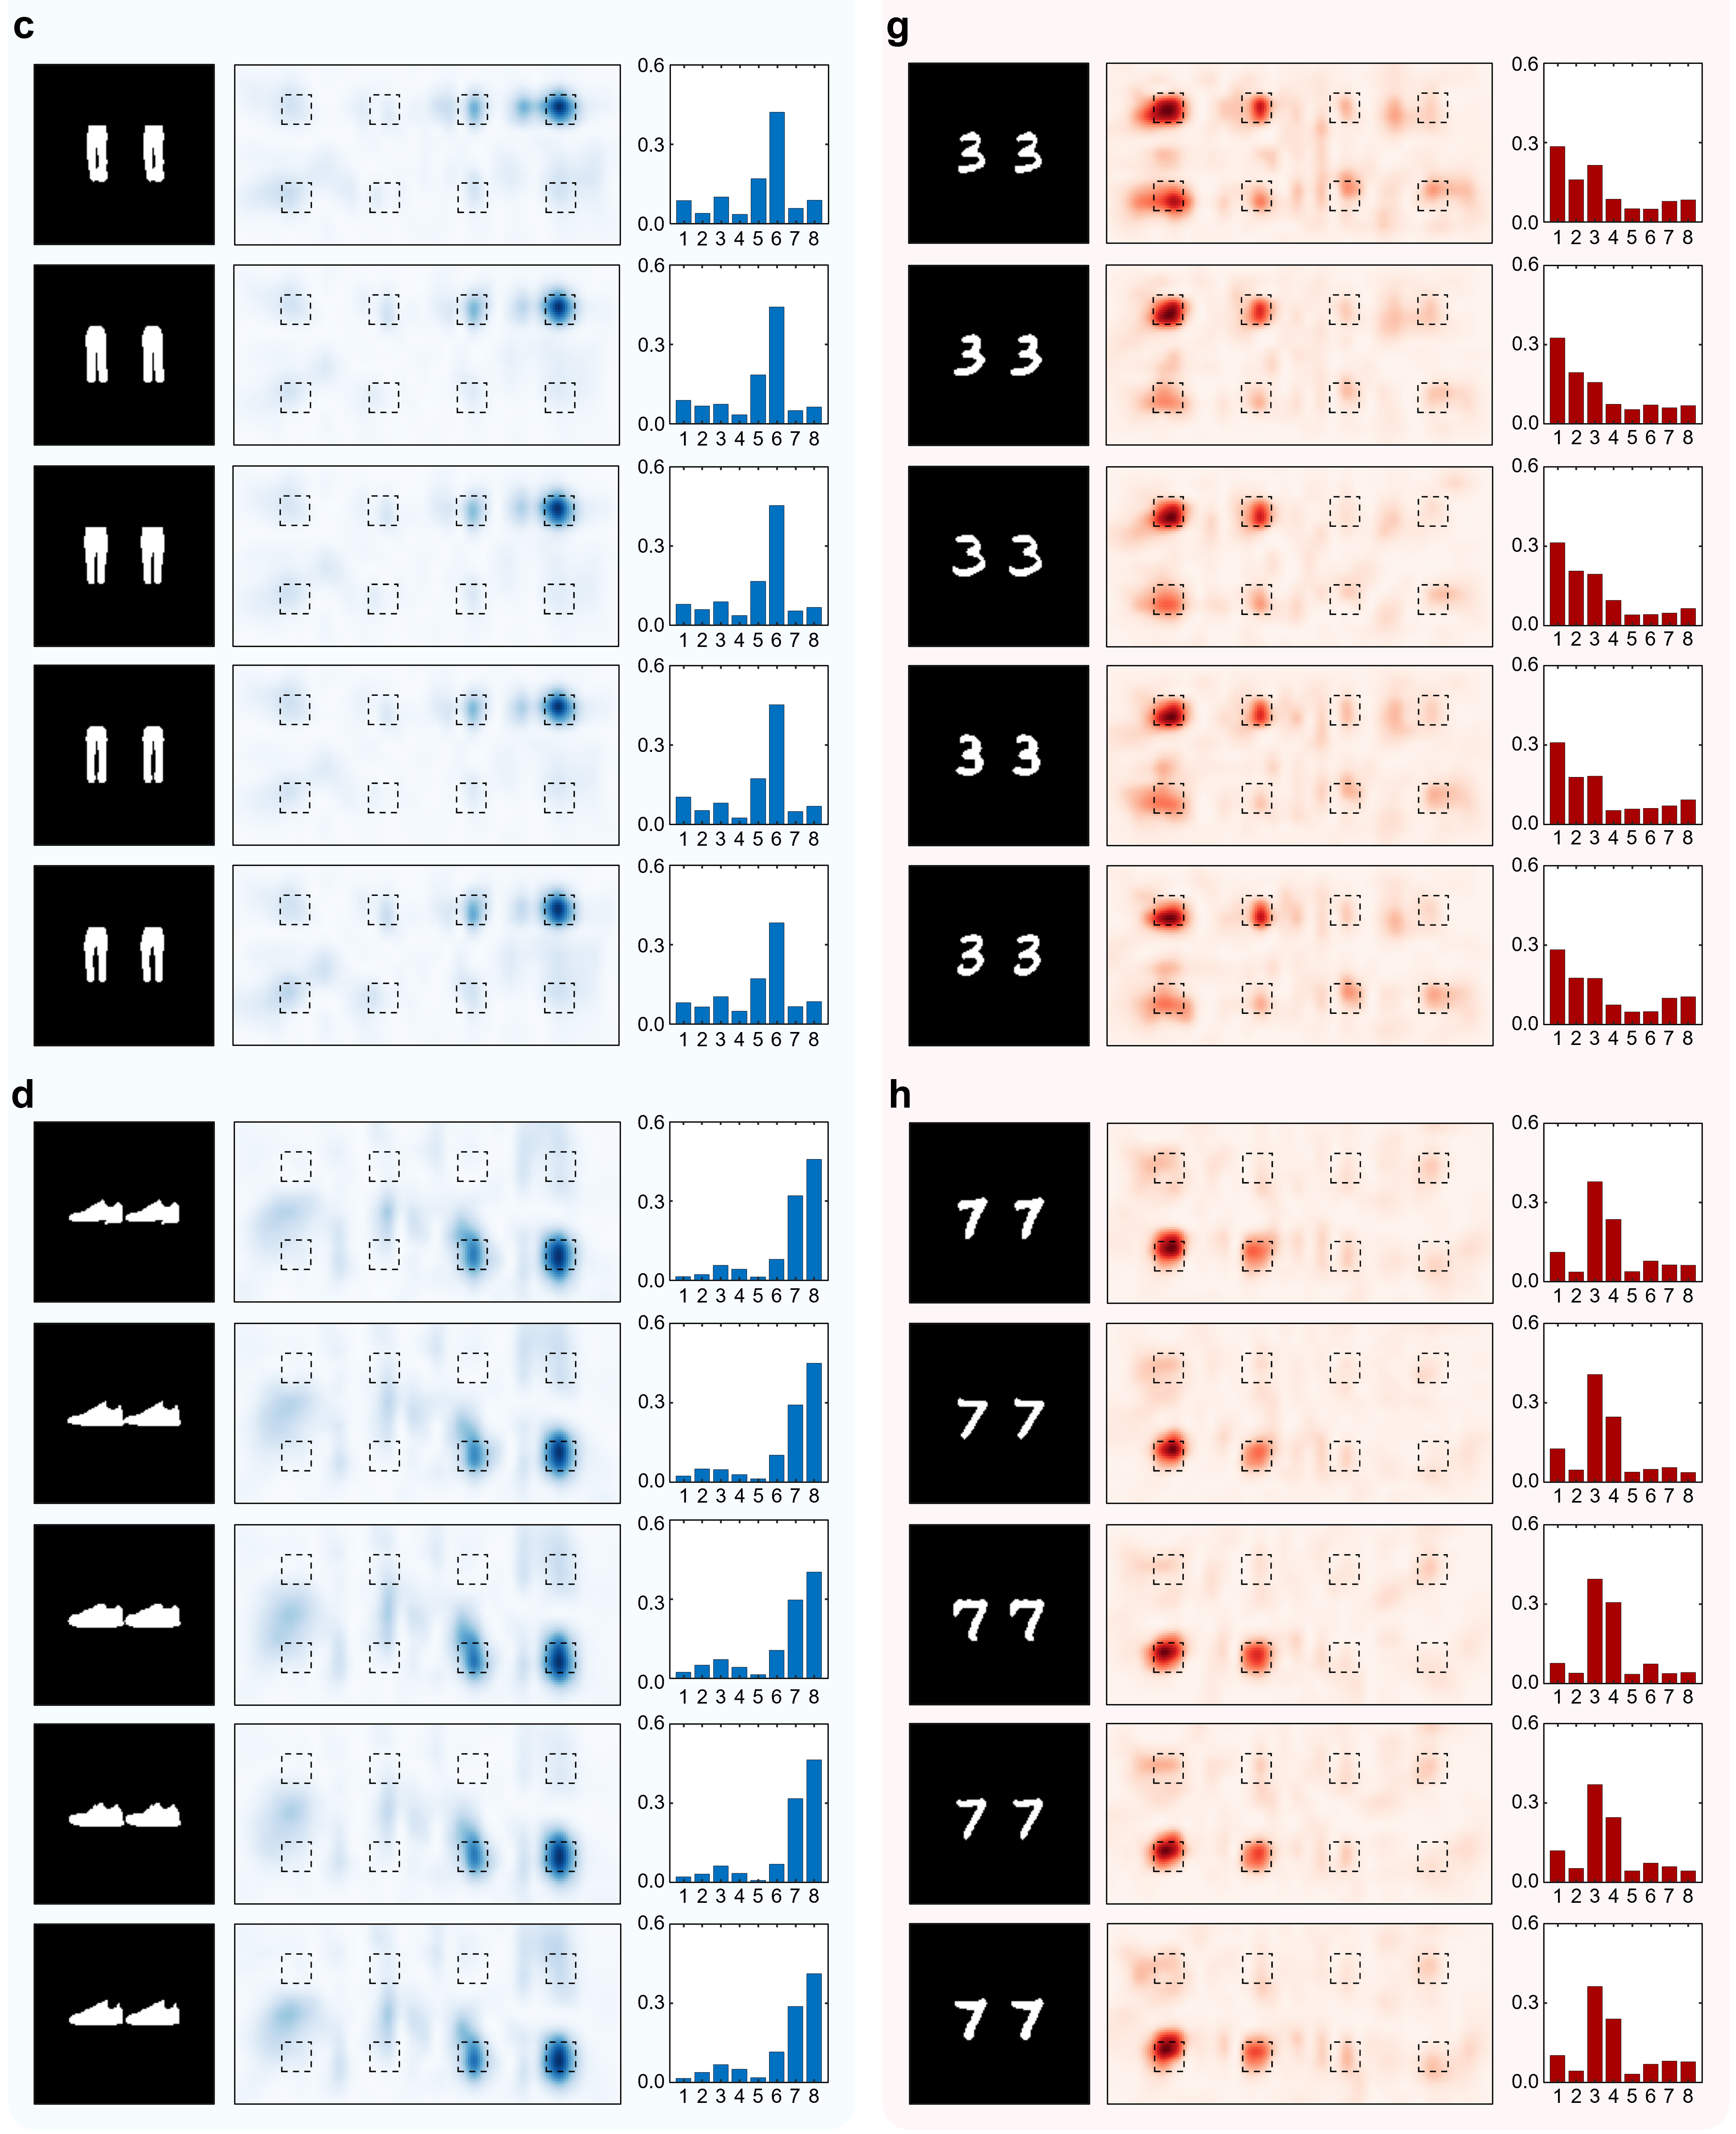


**Fig. S5 Experimental demonstration of the TDP for double object inputs with different appearances. a-d** Before heating, for the recognition of 20 trouser/sneaker-trouser/sneaker pairs, the measured output electric field intensity distributions and corresponding energy distributions of the TDP. **e-h** After heating, the measured results of the TDP for the inputs of 20 3/7-3/7 pairs.

To demonstrate the robustness of the TDP for the classification of double object, the experimental results of the TDP for 40 different double object inputs, under the illumination of *x*-polarized waves at 0.5 THz, are illustrated in Fig. S5. At room temperature, five trouser-sneaker pairs with different appearances are input into the TDP, as shown in Fig. S5a. The output electric field intensity distributions and the calculated energy distributions depict the classification results. Figures S5b-d present the classification results for five sneaker-trouser pairs, five trouser-trouser pairs, and five sneaker-sneaker pairs, respectively. After heating, Figs. S5b-h demonstrate the classification results of the TDP for the inputs of 20 different 3-7 pairs, 7-3 pairs, 3-3 pairs, and 7-7 pairs, respectively.

**Section 7: The adaptability of the TDP-based decoder to different appearances of ciphertext.**


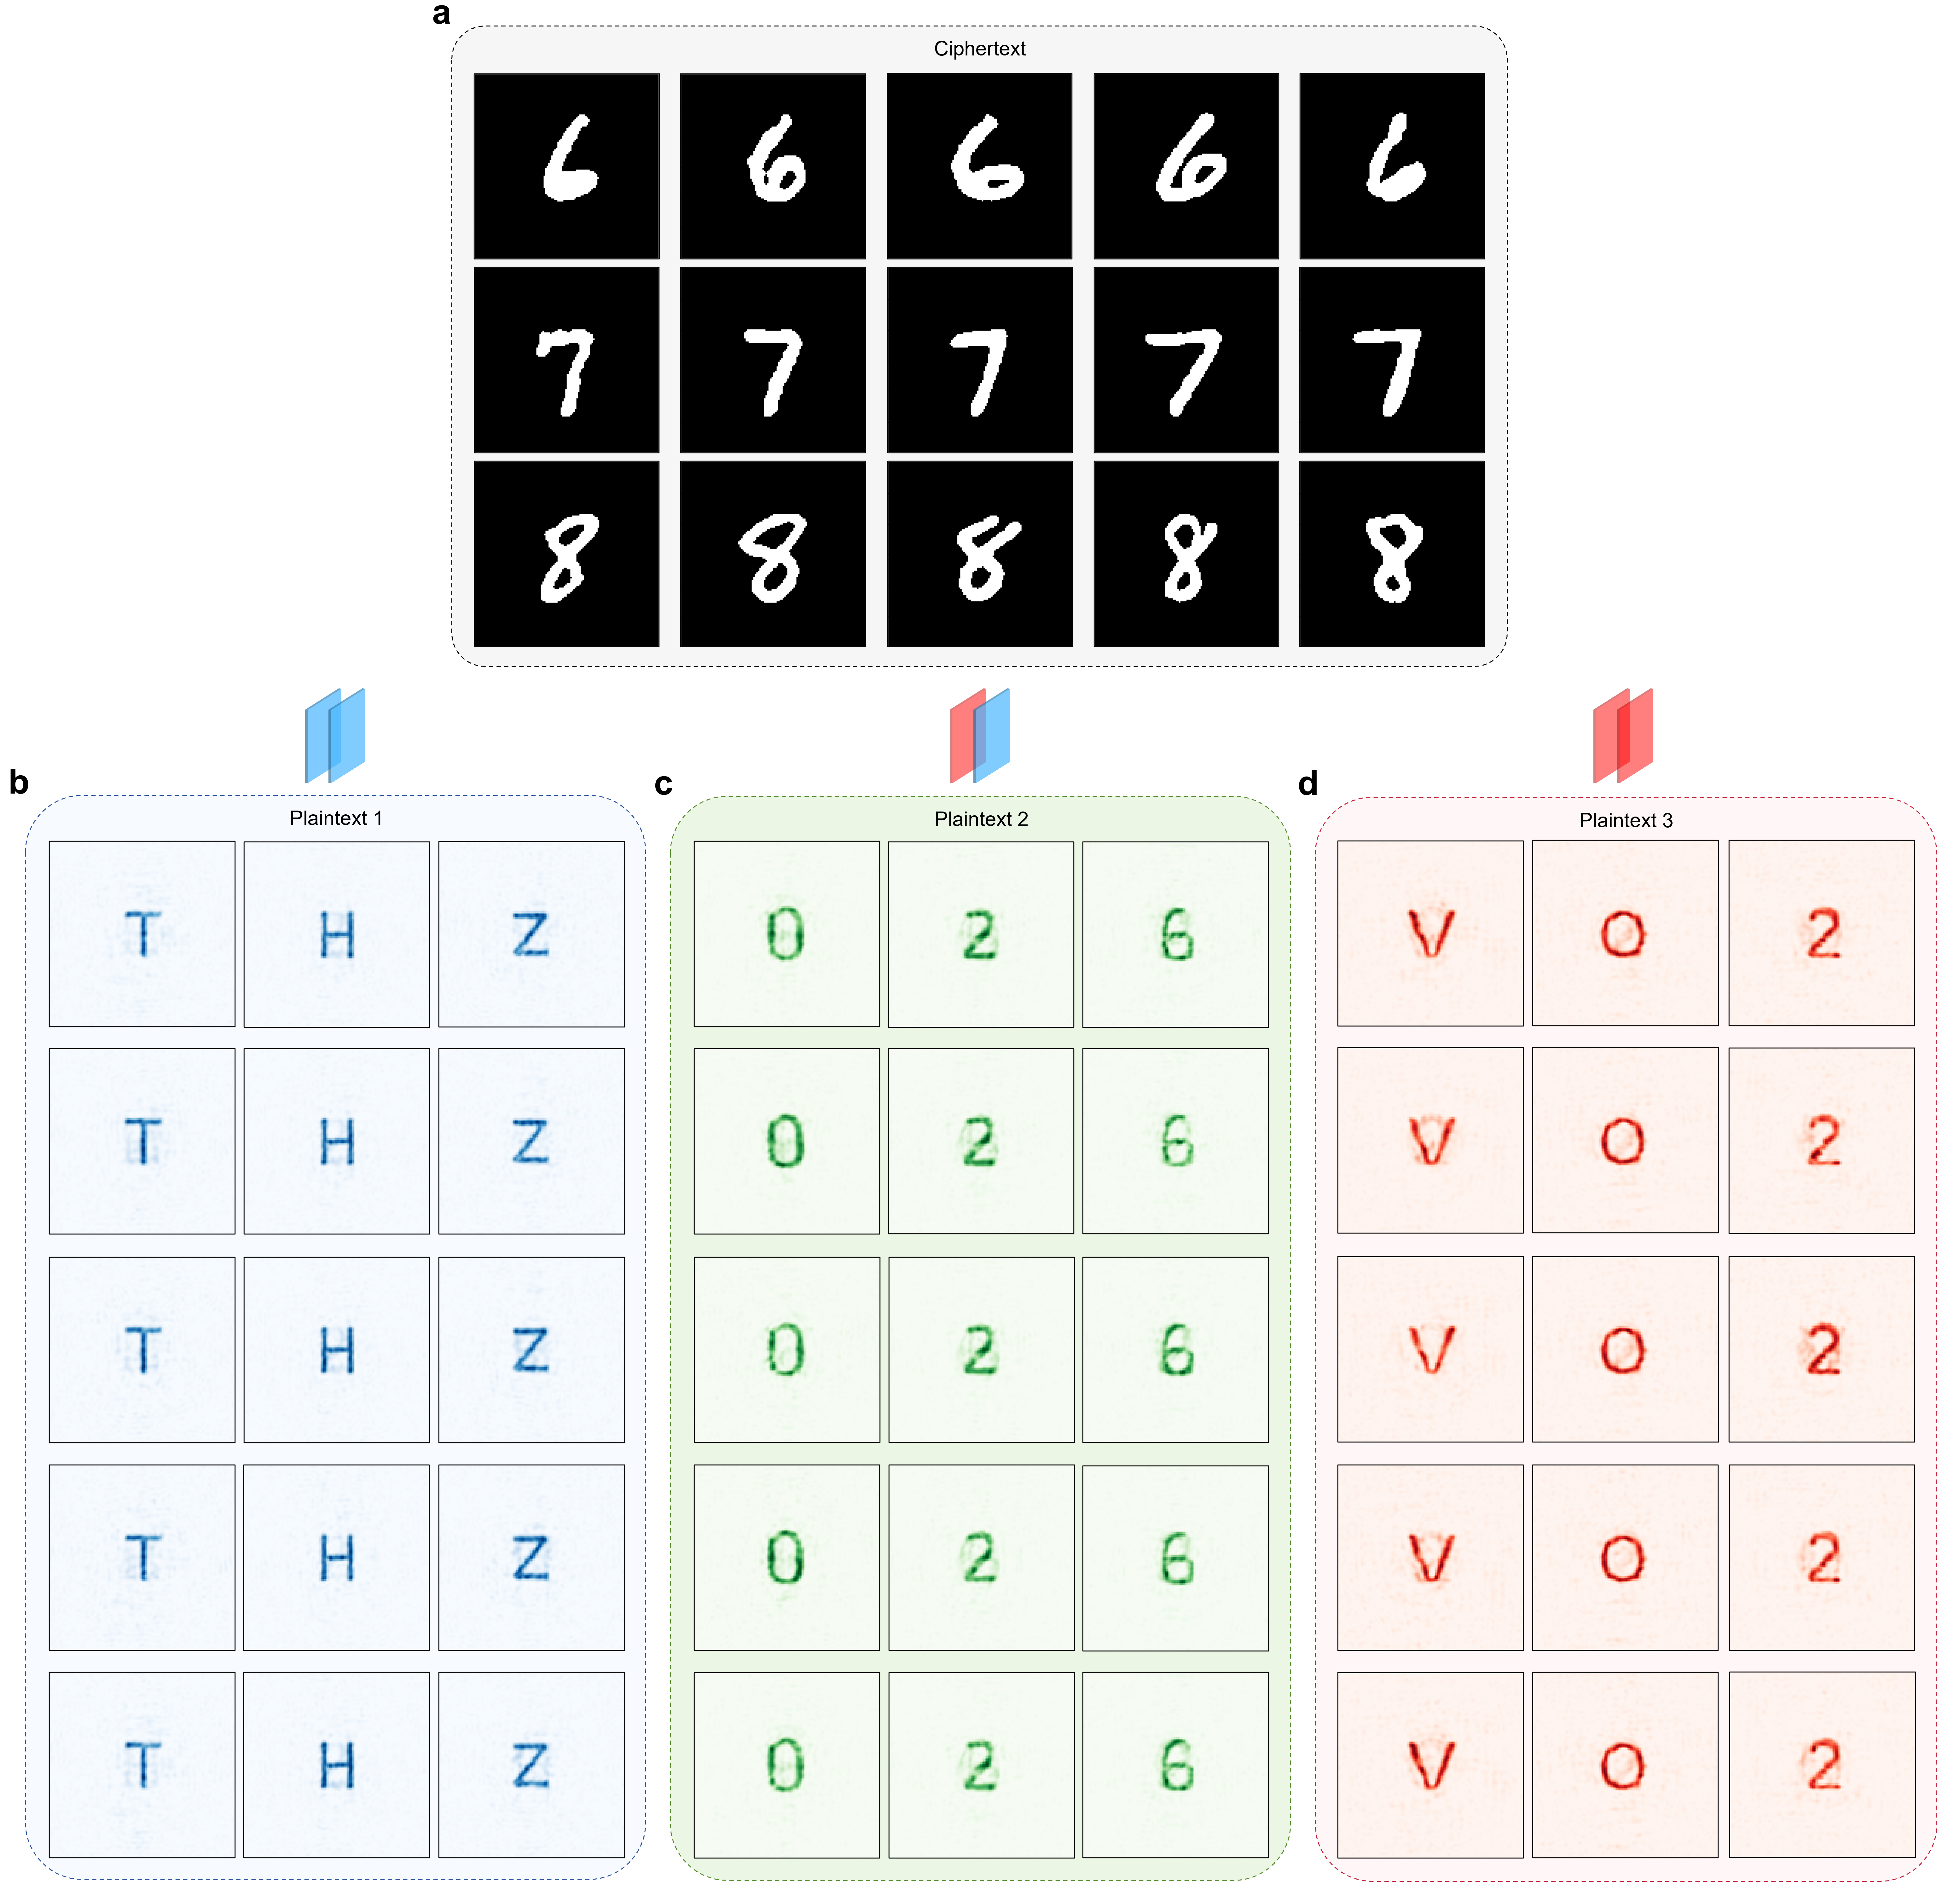


**Fig. S6 Calculated results of the TDP-based decoder for the ciphertexts with different appearances. a** Three ciphertexts “6”, “7”, and “8”, each with five different appearances. **b-d** Decrypted plaintexts obtained using TDP-based decoder under three different temperature conditions.

The TDP-based decoder can adapt to different appearances of the same input ciphertext. For example, as illustrated in the first row of Fig. S6a, five different appearances of the ciphertext “6” are selected as input. Then, as shown in the first column of Fig. S6b, after being decrypted by the TDP-based decoder under the first temperature condition, five different output electric field intensity distributions are obtained, and the profile of the plaintext “T” can be observed. Under the second and third temperature conditions, the output electric field intensity distributions present the profiles of plaintexts “0” (first column of Fig. S6c) and “V” (first column of Fig. S6d), respectively. Similarly, five different appearances of the ciphertext “7”/”8” can be decrypted to obtain the plaintexts “H”, “2”, and “O”/“Z”, “6”, and “2”, under three different temperature conditions. Therefore, the transmitted ciphertext “678” with different appearances can also reveal the plaintext information “THZ”, “026”, and “VO2”.
